# Supplementary material
Source: HighWire-hosted journal article supplement (https://bmjopen.bmj.com/content/7/12/e016559)
Supplement: inline-supplementary-material-1 [file inline-supplementary-material-1.pdf]

Table 1. A comparison of the incidence rates for 5-year age-groups between 50-69 years for cancers of the breast, prostate, and trachea/bronchus/lung in four different regions of the world.

| <b>FEMALE</b>                     | <b>Population &amp; age-group (yrs.)</b> | <b>50-</b> | <b>55-</b> | <b>60-</b> | <b>65-69</b> |
|-----------------------------------|------------------------------------------|------------|------------|------------|--------------|
| Breast                            | New Delhi                                | 105.7      | 110.9      | 123.4      | 106.9        |
|                                   | Mumbai                                   | 89.0       | 98.2       | 106.8      | 101.7        |
|                                   | UK-England                               | 259.5      | 281.5      | 332.5      | 360.3        |
|                                   | Lahore                                   | 130.3      | 158.5      | 154.1      | 157.9        |
| <b>MALE</b>                       | <b>Population &amp; age-group (yrs.)</b> | <b>50-</b> | <b>55-</b> | <b>60-</b> | <b>65-69</b> |
| Prostate                          | New Delhi                                | 5.0        | 1.7        | 40.2       | 65.5         |
|                                   | Mumbai                                   | 3.4        | 10.2       | 20.0       | 36.4         |
|                                   | UK-England                               | 46.4       | 143.6      | 295.9      | 652.7        |
|                                   | Lahore                                   | 4.4        | 13.1       | 27.1       | 46.0         |
| Trachea,<br>bronchus, and<br>lung | New Delhi                                | 30.5       | 47.4       | 79.0       | 82.0         |
|                                   | Mumbai                                   | 13.7       | 26.9       | 40.8       | 57.4         |
|                                   | UK-England                               | 43.4       | 86.4       | 163.2      | 254.2        |
|                                   | Lahore                                   | 4.8        | 13.1       | 21.4       | 32.0         |

Time periods for: New Delhi-India, Mumbai-India, and UK-England (2003-2007) from IARC's CI5 Volume X and Lahore-Pakistan (2010-2012).
